# Supplementary material
Source: publisher figshare collection journal article supplement (https://acs.figshare.com/ndownloader/files/3866350)
Supplement: Supplementary file 1 [file 3866350]

# Biomimetic Ultra-Bubble-Repellent Surfaces Based on Self-Organized Honeycomb Film

*Jun Kamei<sup>1</sup>, Yuta Saito<sup>1</sup>, and Hiroshi Yabu<sup>2</sup>*

<sup>1</sup>Graduate School of Engineering, Tohoku University, 2-1-1 Katahira, Aoba-ku, Sendai  
980-8577, Japan

<sup>2</sup>Institute of Multidisciplinary Research for Advanced Materials, Tohoku University,  
2-1-1 Katahira, Aoba-ku, Sendai 980-8577, Japan

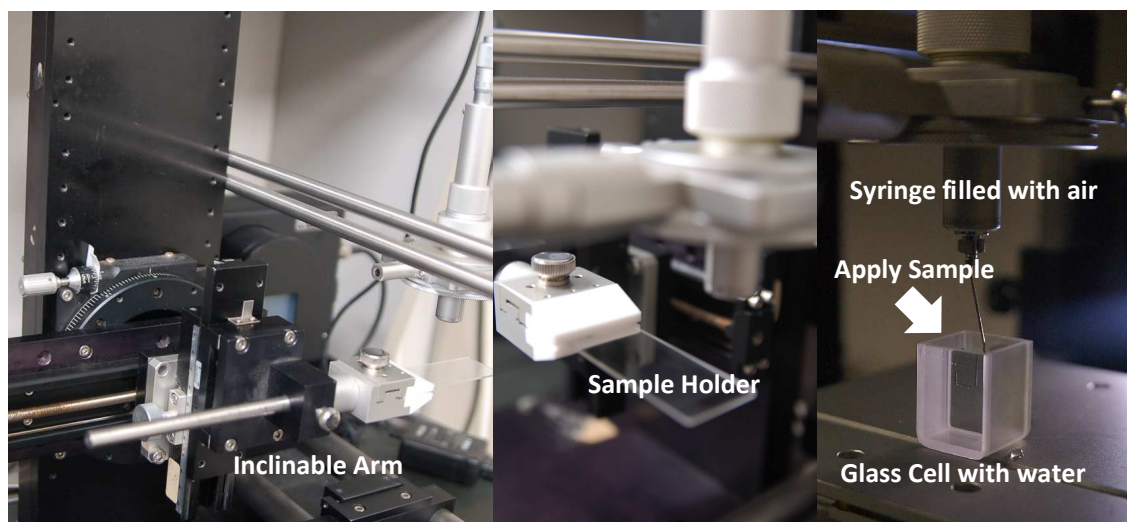

**Figure S1** The first picture shows the inclinable arm used in the sliding angle measurement. The sample was attached to the arm and dipped in a transparent glass cell filled with water for underwater measurement. The tilting angle can be change by rotation of the arm. The actual setting and experimental procedure can also be seen in the Supplementary Video.

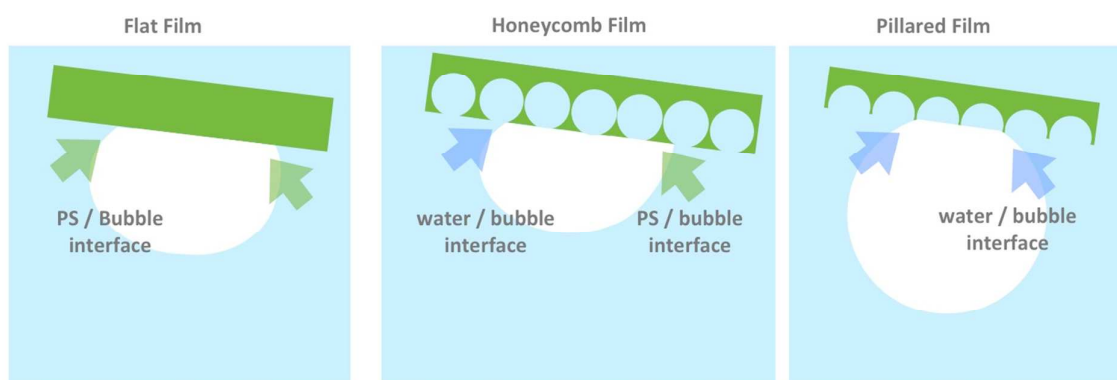

**Figure S2** Schematic image of air bubble on tilted flat, honeycomb and pincushion film. The advancing side and receding side of the bubble on flat film is in contact with PS. Wherea the bubble on the honeycomb film has the advancing side of the bubble being in contact with water and the receding side in contact of PS.
